# Supplementary material for: Production of Stable Electrically Conductive PVDF Membranes Based on Polydopamine-Polyethyleneimine—Assisted Deposition of Carbon Nanotubes
Source: MDPI journal article supplement (doi:10.3390/membranes14040094), 2024-04-20
Supplement: s1 [file s1]

## ***Supporting Information***

### ***Production of Stable Electrically Conductive PVDF Membranes Based on Polydopamine-Polyethyleneimine Assisted Deposition of Carbon Nanotubes***

Abdelrahman M Awad <sup>1</sup>, Charles-François de Lannoy <sup>1,2,\*</sup>

<sup>1</sup> Department of Chemical Engineering, McMaster University, 1280 Main Street West, Hamilton, Ontario, L8S 4L7, Canada.

<sup>2</sup> Department of Chemistry and Chemical Biology, McMaster University, 1280 Main Street West, Hamilton, Ontario, L8S 4L7, Canada.

\*Corresponding author: delannoc@mcmaster.ca

#### ***1. Permeability set-up and electrochemical MO degradation cell***

The pure water permeability set-up is shown in Figure S1a. Prior to permeability measurements, the membranes were compressed under a pressure of 80-100 psi for 60 min. Pure water flux was then measured from the volume of the permeate water (measured by a digital balance (VWR, USA). The flux was measured at a transmembrane pressure of 10, 20, 30, and 40 psi. The water permeability (in litre/(m<sup>2</sup>.h. bar) was estimated from the slope of the linear plot of flux vs transmembrane pressure.

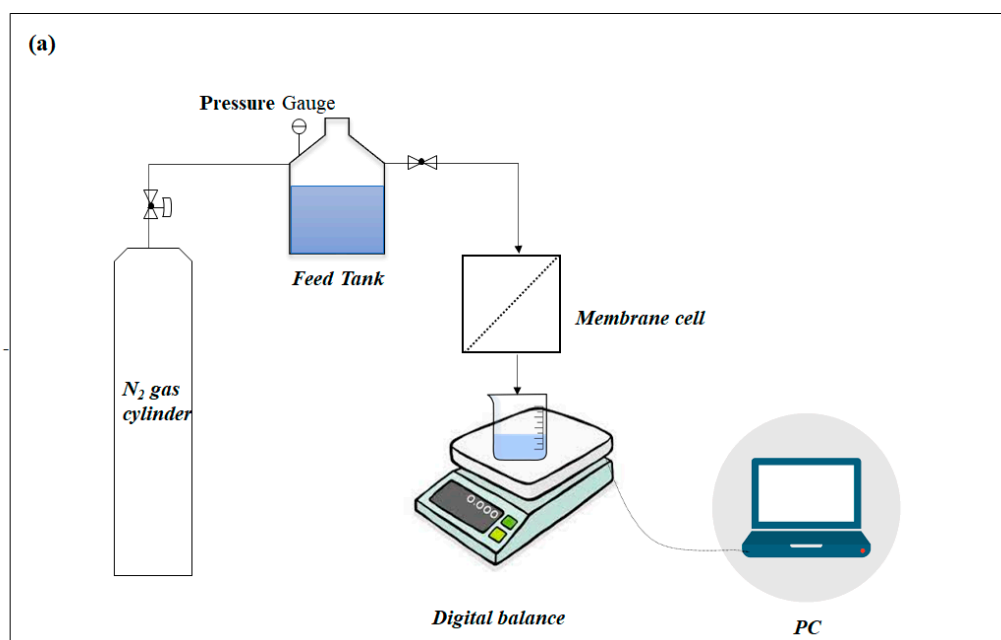

## Supporting Information

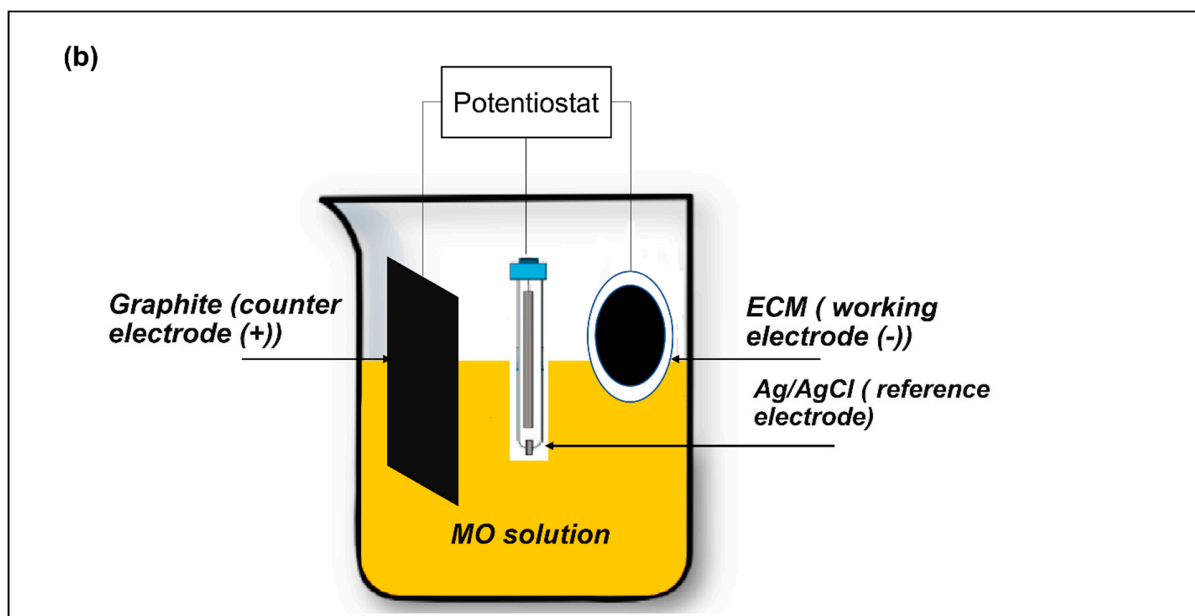

Figure S1. Schematic diagram of (a) the permeability test set-up, and (b) the electrochemical MO degradation cell.

### 2. Methyl Orange (MO) calibration curve

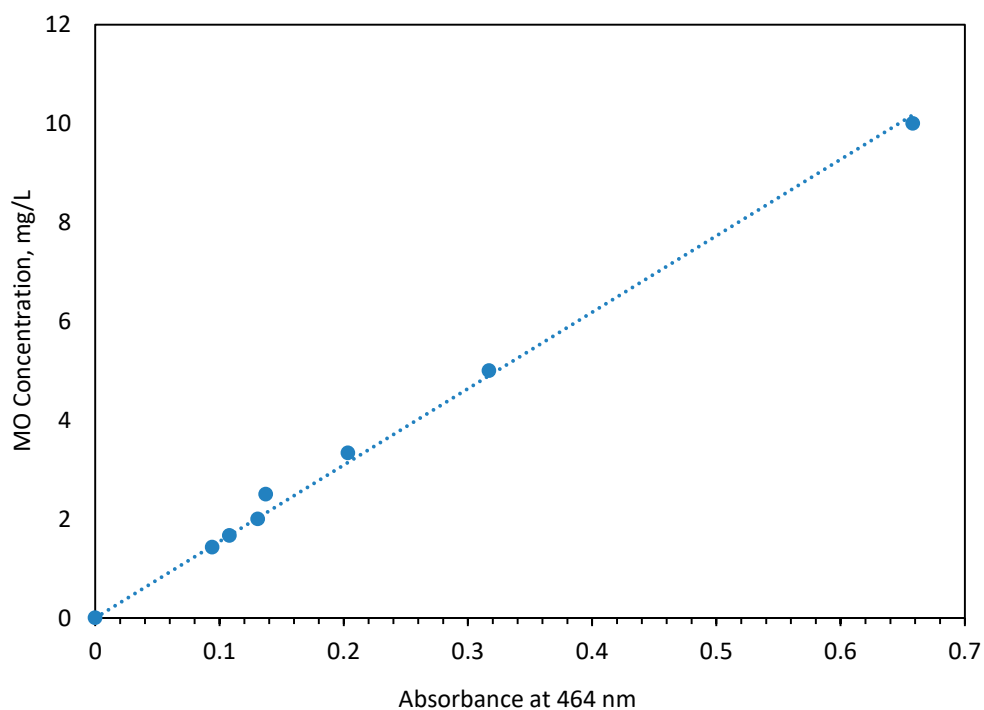

Figure S2. Methyl orange concentration vs UV-vis absorbance intensity at 464 nm. The calibrated follows a linear relation of  $y=15.6x$ , with  $R^2$  of 0.9986.

## Supporting Information

### 3. Surface Scanning Electron Microscope

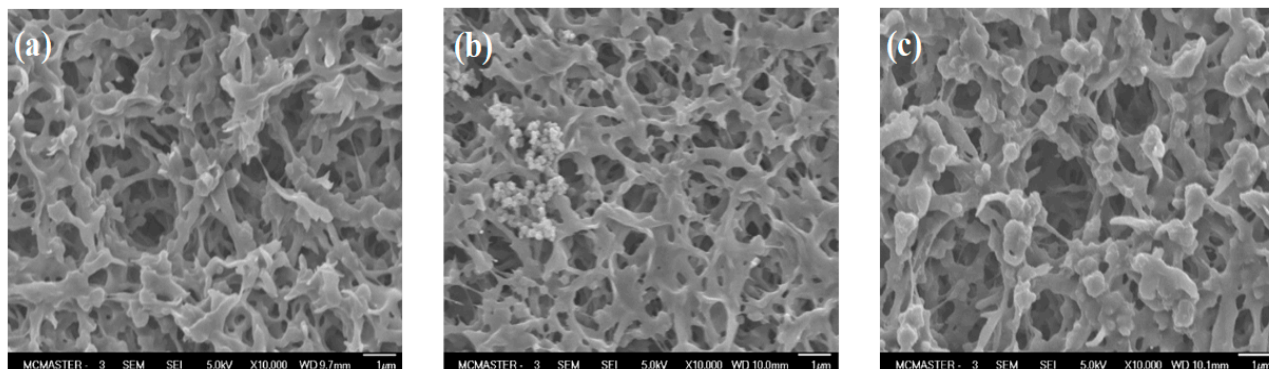

Figure S3. Surface SEM images of (a) PVDF, (b) PDA-coated PVDF, and (c) PDA/PEI-coated PVDF membranes.

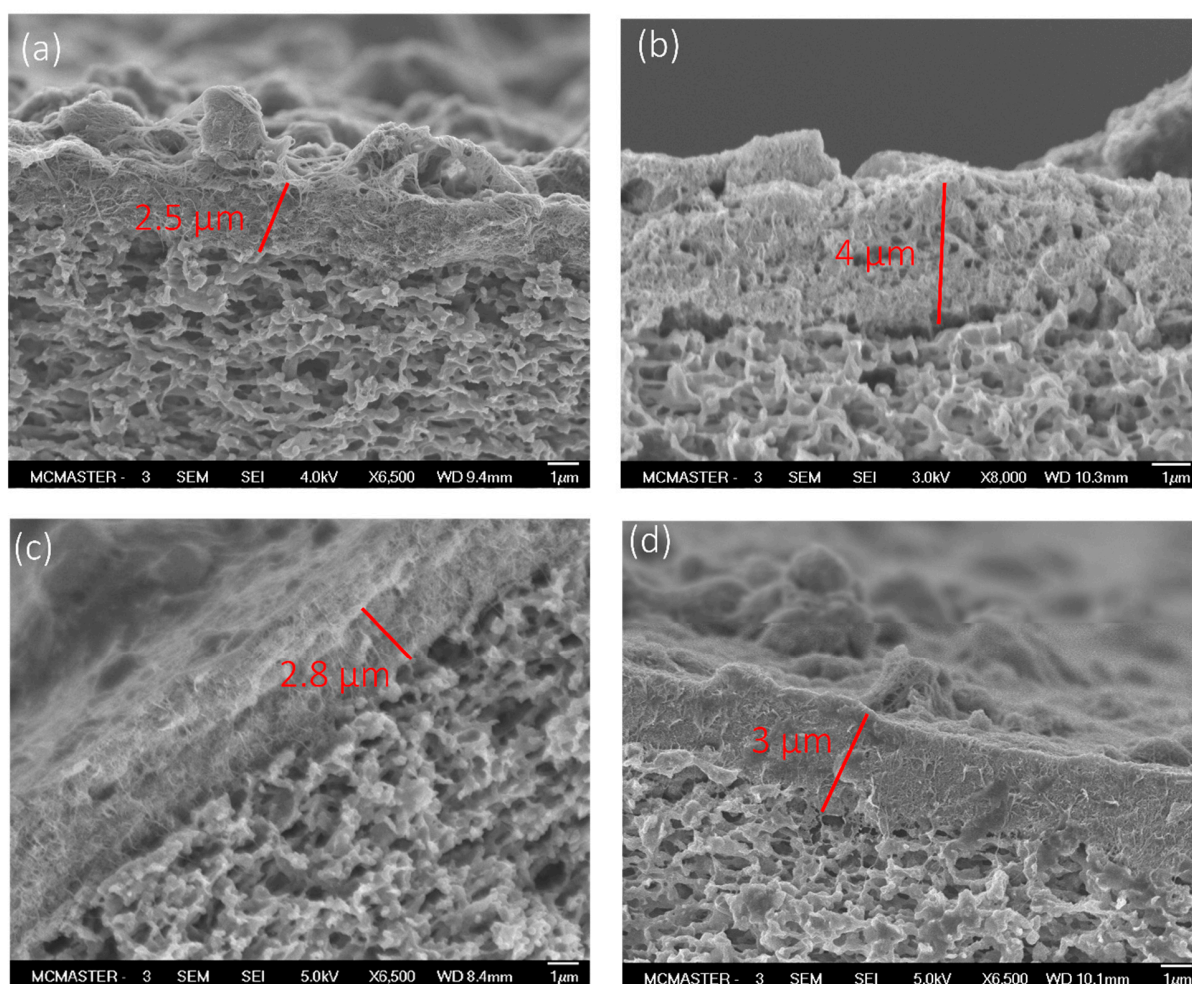

Figure S4. Cross sectional SEM images of (a) M<sub>1</sub>, (b) M<sub>2</sub>, (c) M<sub>3</sub>, and (d) M<sub>4</sub>.

## Supporting Information

### 4. Water permeability of membrane supports.

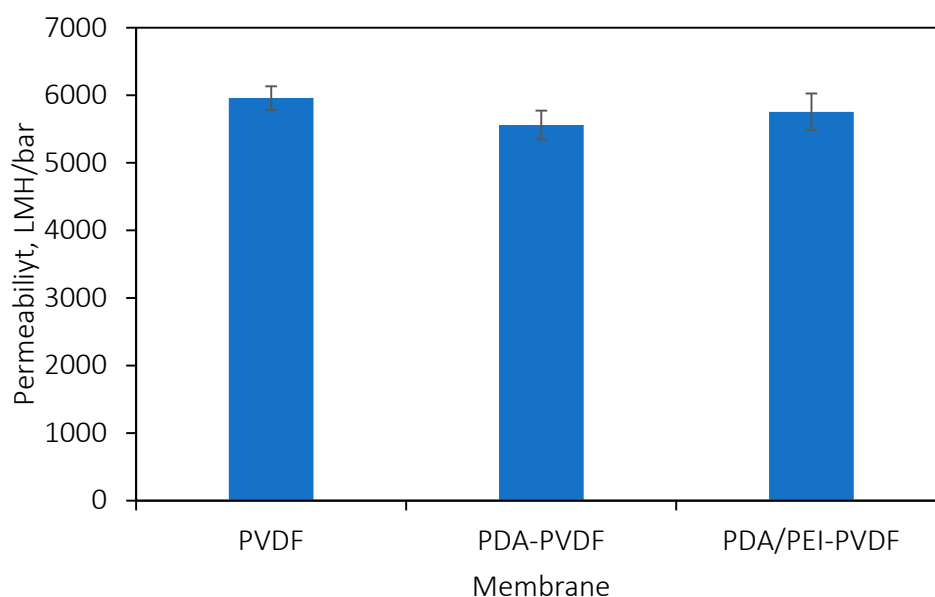

**Figure S5.** Water permeability of underlying membrane supports.  $\blacktriangle$ ), data are mean values and error bars are standard deviations from 3 replicates

### 5. Contact angle measurements

The surface wettability of ECMs were evaluated based on contact angle measurements as shown in Figure S6. Dynamic CA was measured instead of static CA because the membranes have porous structures which leads to inevitable penetration of water droplets due to capillary effects. Even though the initial contact angles of membrane prepared by different methods were almost similar ( $\sim 55 \pm 5.3^\circ$ ), the decline rate in the estimated CA was more rapid for ECMs produced by method 2. This lower CA can be explained by the fact that the hydrophobic CNTs are coated with the hydrophilic PEI as confirmed by SEM images.

## Supporting Information

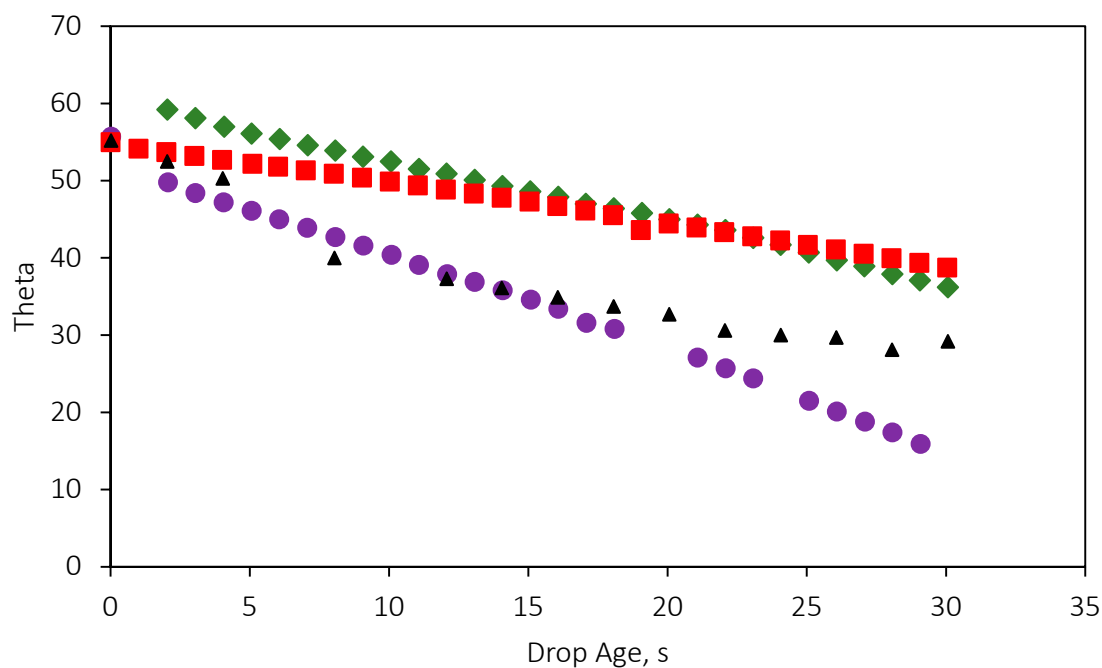

Figure S6. Contact angle measurements of  $M_1$  (green rhombus),  $M_2$  (purple circles),  $M_3$  (red squares), and  $M_4$  (black triangles).

## 5.. MO removal by physical adsorption

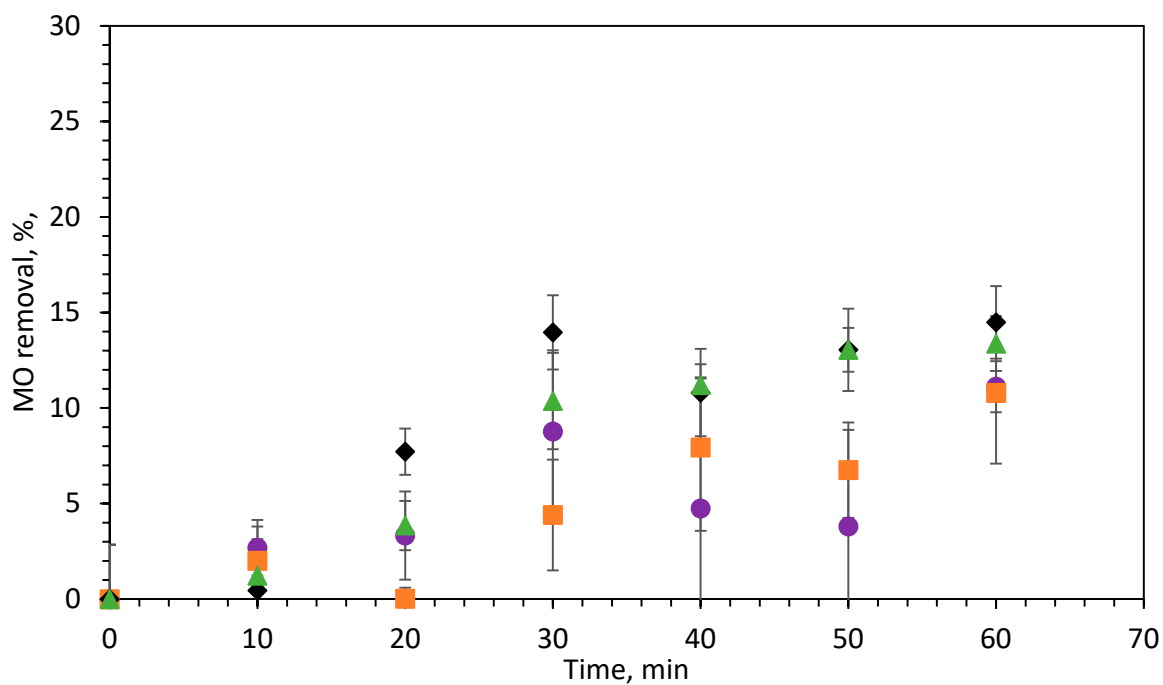

Figure S7. MO removal by only physical adsorption for  $M_1$  (purple circles, ●),  $M_2$  (orange squares, ■),  $M_3$  (black diamonds, ◆), and  $M_4$  (green triangles, ▲). Data are mean values and error bars are standard deviations from 3 replicates.

## Supporting Information

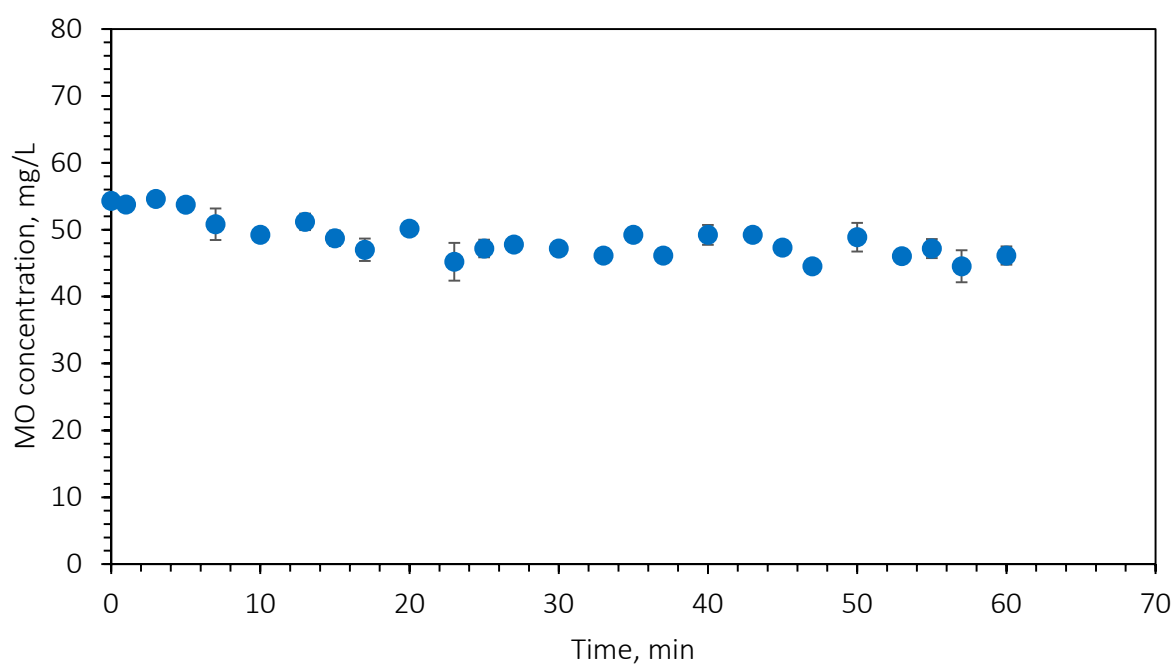

**Figure S8.** MO removal by PDA/PEI coated PVDPF control membrane as at -3V applied potential.
